# Supplementary material
Source: publisher figshare collection journal article supplement (https://geolsoc.figshare.com/ndownloader/files/14358596)
Supplement: Supplementary file 1 [file 14358596]

## Sheet: Sheet1
Table S2 Sandstone chemistry ch. 10 Upukerora Fm. XRF
Sample name	NZ 52-056	NZ-52-101	NZ-52-109	NZ-52-110	NZ-52-128	NZ-52-131		NZ13-104	NZ13-105	NZ13-106	NZ13-120	NZ13-121	NZ13-123	N14-119		NZ13-74	NZ13-76		N14-112	N14-113	N14-114	N14-115		N14-57	N14-58	N14-59	N14-60	N14-62	N14-65
Rock type	fine Sandstone	med sandstone	med. Sandstone	fine sandstone	fine sandstone	very fine sandstone		sandstone matrix	sandstone matrix	med. Sandstone	red silty sandstone	brown silty sandstone	dark mudstone	med. Sandstone		granular matrix	med. Sandstone		med. Sandstone	med. sandstone	siltstone	med. Sandstone		med. Sandstone	med. Sandstone	fine sandstone	med. Sandstone	med. Sandstone	med. Sandstone
Region	Alpine area	Alpine area	Alpine area	Alpine area	Alpine area	Alpine area		Baldhill, Southland	Baldhill, Southland	Baldhill, Southland	Baldhill, Southland	Baldhill, Southland	Baldhill, Southland	Baldhill, Southland		Westdome, Southland	Westdome, Southland		Westdome, Southland	Westdome, Southland	Westdome, Southland	Westdome, Southland		Gyzeh, Southland	Gyzeh, Southland	Gyzeh, Southland	Gyzeh, Southland	Gyzeh, Southland	Gyzeh, Southland
GPS	NA	NA	NA	NA	NA	NA		S45 38242 E168 10148	S45 38192 E168 10249	S45 38189 E168 10249	S45 37756 E168 11648	S45 36153 E168 13091	S45 36159 E168 13211	E21 26565 N55 24847		S45 58872 E168 20054	S45 59702 E168 22747		E21 34729 N55 03089	E21 34781 N55 03189	E21 31978 N55 07054	E21 33259 N55 06596		E21 44077 N55 03993	E21 44169 N55 04038	E21 44166 N55 04071	E21 44204 N55 04105	E21 44485 N55 03973	E21 44544 N55 03945
Major Elements
SiO2	59.2971	54.0385	57.0145	55.31	53.47	66.6817		59.2655	53.2977	53.9685	53.3788	62.5144	60.9131	54.2916		54.0792	52.7378		50.6654	60.7167	69.96	52.31		51.939	61.8194	58.4001	58.4597	59	66.7546
Al2O3	15.7055	14.7956	15.3924	15.53	14.3	15.0549		14.4012	15.0086	14.884	14.8393	16.6192	15.2106	15.2064		14.5957	13.845		14.726	14.2758	13.09	16.3		17.8802	17.0045	16.7607	18.0452	17.52	15.7906
Fe2O3	8.282	10.159	8.8072	10.24	10.75	5.025		9.512	10.3929	9.5073	11.0635	6.968	7.7467	9.009		9.9064	11.4855		11.8405	9.009	2.94	9.07		9.06445	6.63665	5.5044	5.80165	7.35	4.84565
MgO	3.0704	4.5372	4.2218	3.76	4.25	1.809		4.00775	4.9692	5.4873	4.88215	2.3192	2.4644	5.445		5.16635	4.14375		5.6317	2.8017	0.87	4.66		4.1392	2.09945	2.1087	2.8171	2.49	1.4328
CaO	4.9187	6.59685	5.8277	4.71	8.82	2.1909		4.04875	7.3225	6.5727	6.62795	1.56	2.1917	6.831		5.18665	10.452		6.9053	3.2175	3.67	7.06		6.5471	2.6069	6.237	4.83635	3.18	1.04475
Na2O	2.4139	4.975	2.1513	3.03	4.43	2.36175		4.141	2.9391	4.21095	4.41525	2.7664	2.9391	4.3164		2.66945	2.496		2.91535	5.148	0.99	2.28		4.44765	3.3034	3.5244	5.07275	3.85	3.1641
K2O	2.24725	0.647745	1.96849	2.593	0.422	2.74063		1.13877	0.73629	0.284415	1.15101	2.90056	2.98354	0.20196		1.42201	0.0195		1.10047	1.84833	2.037	0.779		0.737295	1.62782	1.37016	1.35536	1.722	2.45168
TiO2	0.69892	1.0139	0.82214	0.948	0.973	0.64923		0.6355	0.90496	1.09143	0.68411	0.8216	0.81507	1.05633		0.95613	1.07932		1.16117	0.9009	0.341	0.968		0.95122	0.854705	0.70389	0.66783	0.854	0.65073
MnO	0.10504	0.13532	0.12524	0.137	0.143	0.06834		0.124025	0.16665	0.18492	0.18067	0.10192	0.10504	0.1386		0.12992	0.164775		0.18706	0.09306	0.017	0.144		0.140295	0.080595	0.11286	0.10244	0.088	0.04179
P2O5	0.11211	0.140295	0.11514	0.177	0.133	0.244215		0.0738	0.14847	0.099495	0.065975	0.17056	0.09393	0.11088		0.11571	0.174525		0.172135	0.23364	0.071	0.185		0.14328	0.11741	0.17127	0.13002	0.141	0.110445
LOI	2.93	2.49	3.48	2.93	2.32	3		2.52	3.78	3.47	2.76	3.08	4.41	3.36		5.52	3.57		4.71	1.64	5.42	6.04		3.58	3.99	4.56	2.56	3.58	3.51
Total	99.7809	99.5294	99.9259	99.365	100.011	99.8257		99.8683	99.6664	99.7611	100.049	99.8218	99.8732	99.9672		99.7475	100.168		100.015	99.8846	99.406	99.796		99.5696	100.141	99.4535	99.8484	99.775	99.7971
Minor Elements
Zn	102.9	98.2	97.9	91.2	81.7	83.3		85.2	95.9	90.5	68.1	90.9	111.4	79		123.3	104.5		104.5	72.1	55.3	108.4		89.4	100	83.5	70.1	97.7	84.9
Cu	37.8	191.2	44.2	36.8	136.6	22.6		73.2	96.7	85.1	12.5	45.3	42.7	89.1		377.2	244.2		130.1	20.9	15.9	83.7		64.7	38.1	25.2	41	44.2	20.9
Ni	30	26.7	30.1	28.9	23.8	39.3		19.1	31.2	49.6	13.4	27.2	32.7	47.5		31.2	19.2		26.8	10	8.5	22.9		28.4	22.9	18.4	20.5	23.5	19
Cr	93.8	38.9	98	27.3	44.9	60.5		8.5	65.4	133	37.2	42.1	76.5	99.7		54	31.5		70.9	7.6	20.8	57.8		57.7	50.8	36	38.3	47.4	52.3
V	214.6	444	233.4	463.7	456	121.5		289.1	324.4	313	73.8	115.7	165.5	289		478.1	463.7		503.3	320.4	55.4	256.3		279.6	178.2	129.2	148.7	185.1	110.9
Ba	335.2	185.1	116	100.3	48.2	488.8		77.1	54.4	50.3	199.5	122.2	410.7	20.9		211	5.7		75.6	130.1	254.8	62.7		176.5	412.8	953.2	195.8	251.3	384
Sc	27	41.6	28.3	35.7	42.9	17.1		40.4	38.6	42.4	13.7	24.7	24	36.1		35.2	43.2		49.4	34.9	9.7	36.7		32.5	25.5	19.5	19.2	28.6	19.2
La	8.9	3.7	6.6	3.9	5.3	32.7		4	5.2	2.7	23	20.1	25.1	n.d.		6.9	5.3		0.4	1.2	33.8	5.9		4.3	10.8	5.4	4.4	11.1	17.4
Ce	18.8	12.4	22.7	13.1	13.9	71.2		5.1	13	11.5	53.4	45.8	55.6	9.4		13.8	16		13.2	15.9	74.7	23.7		22.8	33.2	20.6	22.5	35	46.9
Nd	14.5	11.3	13.9	10.4	11.7	33.4		6.1	10.5	9.1	24.7	23.9	28.9	7.8		12.2	14.1		11.2	10	37.6	16.5		11.7	17.3	9.9	10.9	19.4	19.8
U	0.1	0.4	0.1	-0.2	0.1	2.4		-0.2	-0.1	0	2.3	0.2	1.6	n.d.		3.5	0.5				3.8	n.d.
Th	2.5	0.7	2.7	0.9	0.1	9.7		0.7	0.5	2	8.5	3.5	9.2	1.1		1.9	n.d.				16.9	2
Pb	5	2	4.5	1.8	2	13.2		0.9	2.5	1.1	13.8	10.2	15.2	2.9		2.3	2.2				18.4	1.9
Nb	2.9	1	3.2	1.4	1	8.4		0.8	1.5	1.5	6.8	4.6	8.7	1.5		2	1.2		1.3	1.7	8	2.6		3.5	5.9	2.3	2.7	4.9	8.6
Zr	80.7	58.9	112	72.2	56.9	178.6		40.1	66.3	71	161	147	156	70.1		74.2	67.7		63	95.9	170.4	105.8		89.9	140.8	75.3	86.6	130.1	192.8
Y	19.6	19.7	20.7	20.3	21.8	35.2		18.2	22.9	31.3	26.8	27.9	33.7	26.4		18.8	21.9		20.7	19.1	48.2	26.2		20.9	23.4	19.9	15.4	32.5	22.2
Sr	306.6	342.8	1521.2	130.1	328.9	148.7		208.8	204.6	133.1	139.2	132.2	116	145.7		252.2	48.4		299.2	280.9	165.8	193.1		364.8	250.1	512.7	367.8	318	196.4
Rb	60	5.5	44.9	66.8	5.2	95.1		21.8	11.7	3.5	54.2	66.3	99.9	2.3		18	0.7		19.5	35.4	77.5	10		18.3	53.5	30.5	32.1	38.5	81.9
